# Supplementary material for: Phenolato Ti(iv) hexacoordinate complexes for anticancer chemotherapy: enhancement of solubility, hydrolytic stability, and cytotoxicity
Source: Royal Society of Chemistry journal article supplement (doi:10.1039/d3dt00984j), 2023-01-01
Supplement: d3dt00984j1.pdf [file d3dt00984j1.pdf]

## Phenolato Ti(IV) Hexacoordinate Complexes as Anticancer Chemotherapy: Enhancement of Solubility, Hydrolytic Stability, and Cytotoxicity

Mohammad Taha and Edit Y. Tshuva\*

Institute of Chemistry, Edmond J Safra Campus, The Hebrew University of Jerusalem, Jerusalem 9190401, Israel. Edit.tshuva@mail.huji.ac.il

### Supplementary Information

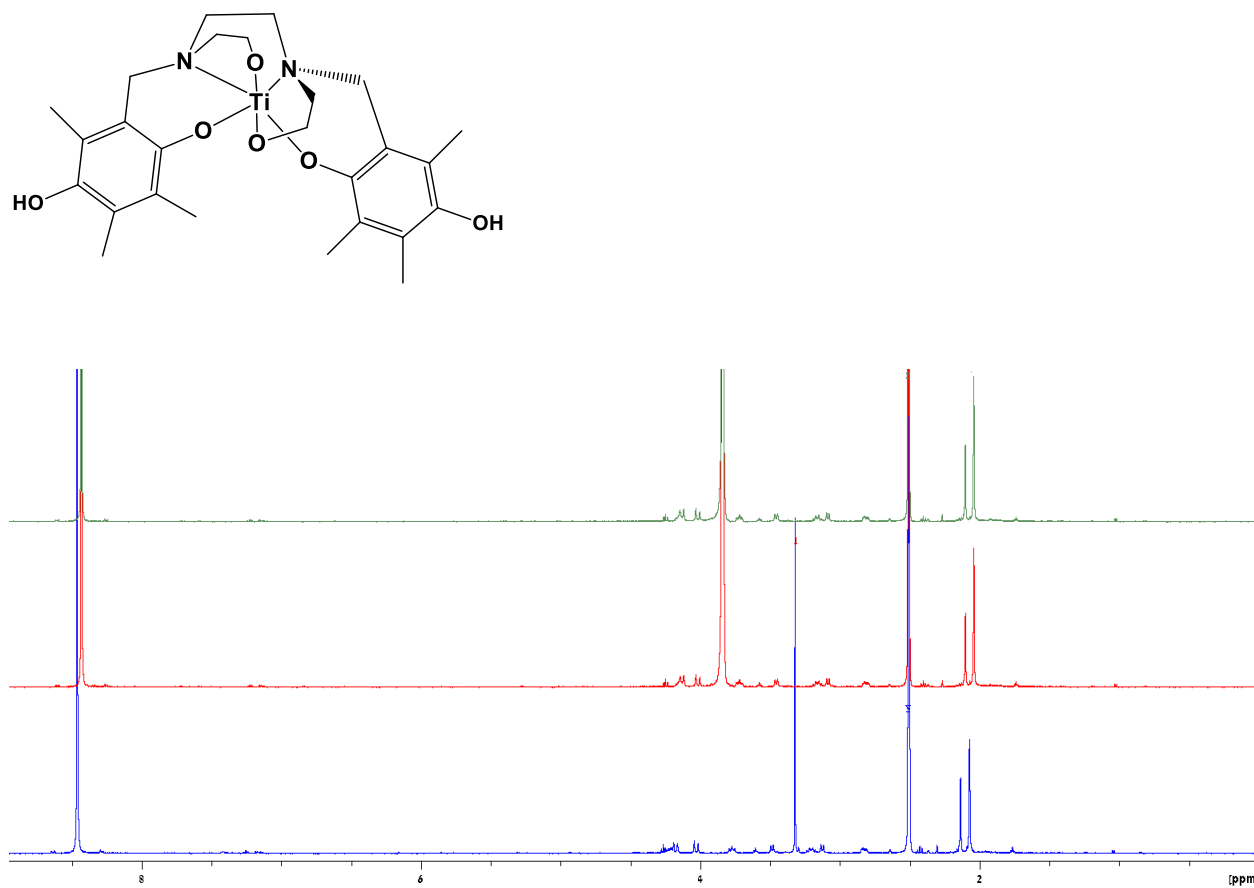

**Figure S1.** <sup>1</sup>H NMR spectra of L<sup>2</sup>Ti in DMSO-*d*<sup>6</sup> before (bottom), immediately after (middle), and 8 days after (top) the addition of 10% D<sub>2</sub>O.

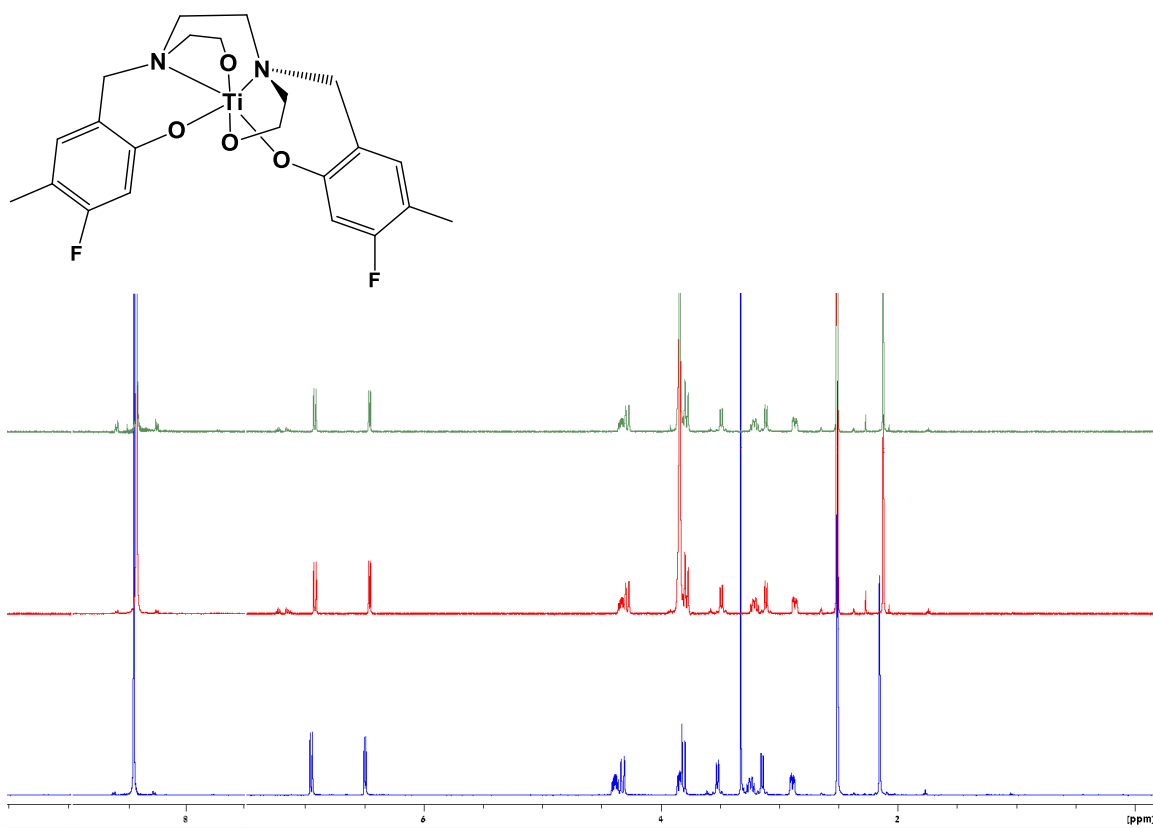

**Figure S2.** <sup>1</sup>H NMR spectra of L<sup>3</sup>Ti in DMSO-*d*<sup>6</sup> before (bottom), immediately after (middle), and 8 days after (top) the addition of 10% D<sub>2</sub>O.

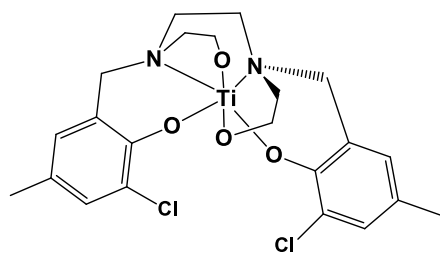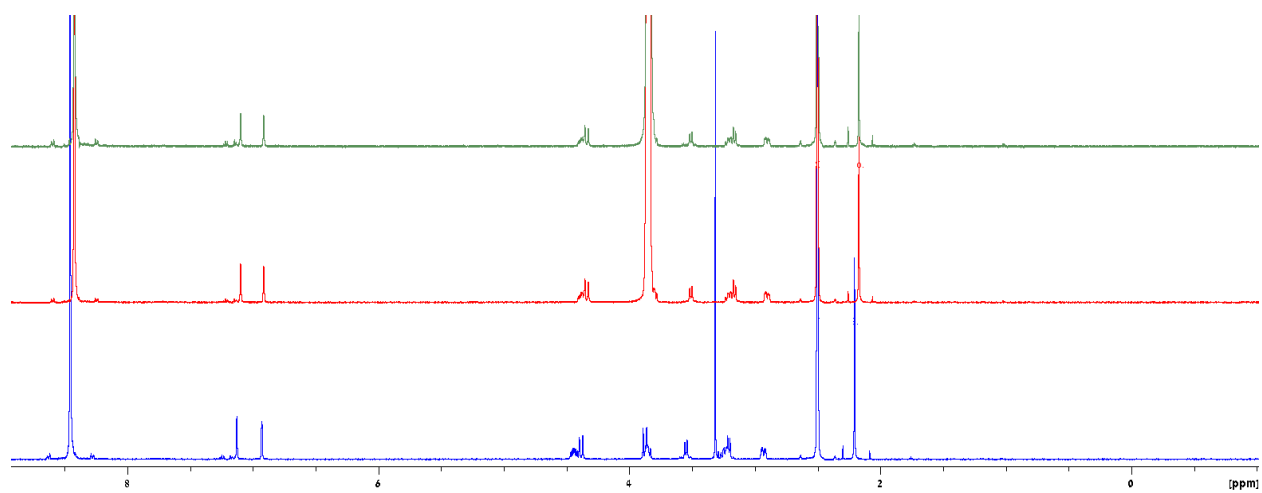

**Figure S3.**  $^1\text{H}$  NMR spectra of  $\text{L}^4\text{Ti}$  in  $\text{DMSO-}d^6$  before (bottom), immediately after (middle), and 8 days after (top) the addition of standard and 10%  $\text{D}_2\text{O}$ .

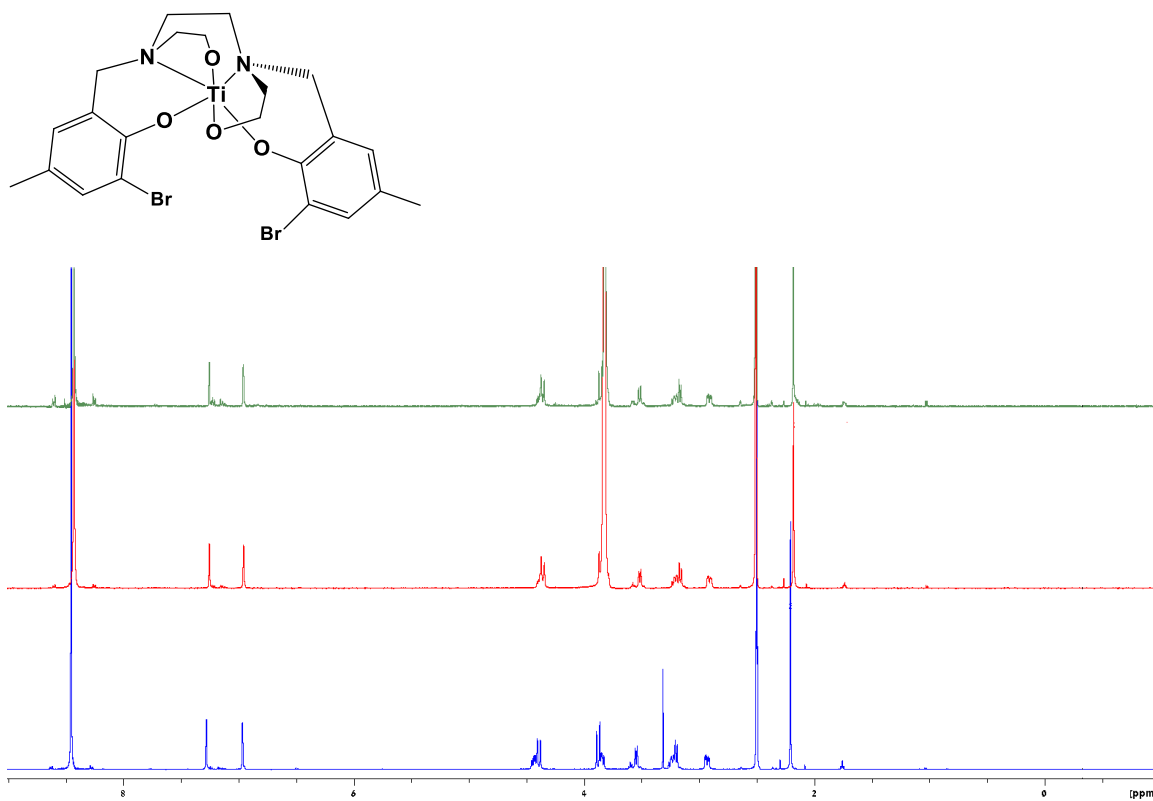

**Figure S4.** <sup>1</sup>H NMR spectra of L<sup>5</sup>Ti in DMSO-*d*<sup>6</sup> before (bottom), immediately after (middle), and 8 days after (top) the addition of standard and 10% D<sub>2</sub>O.

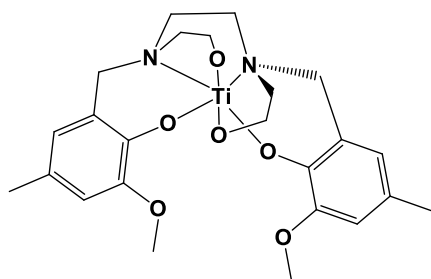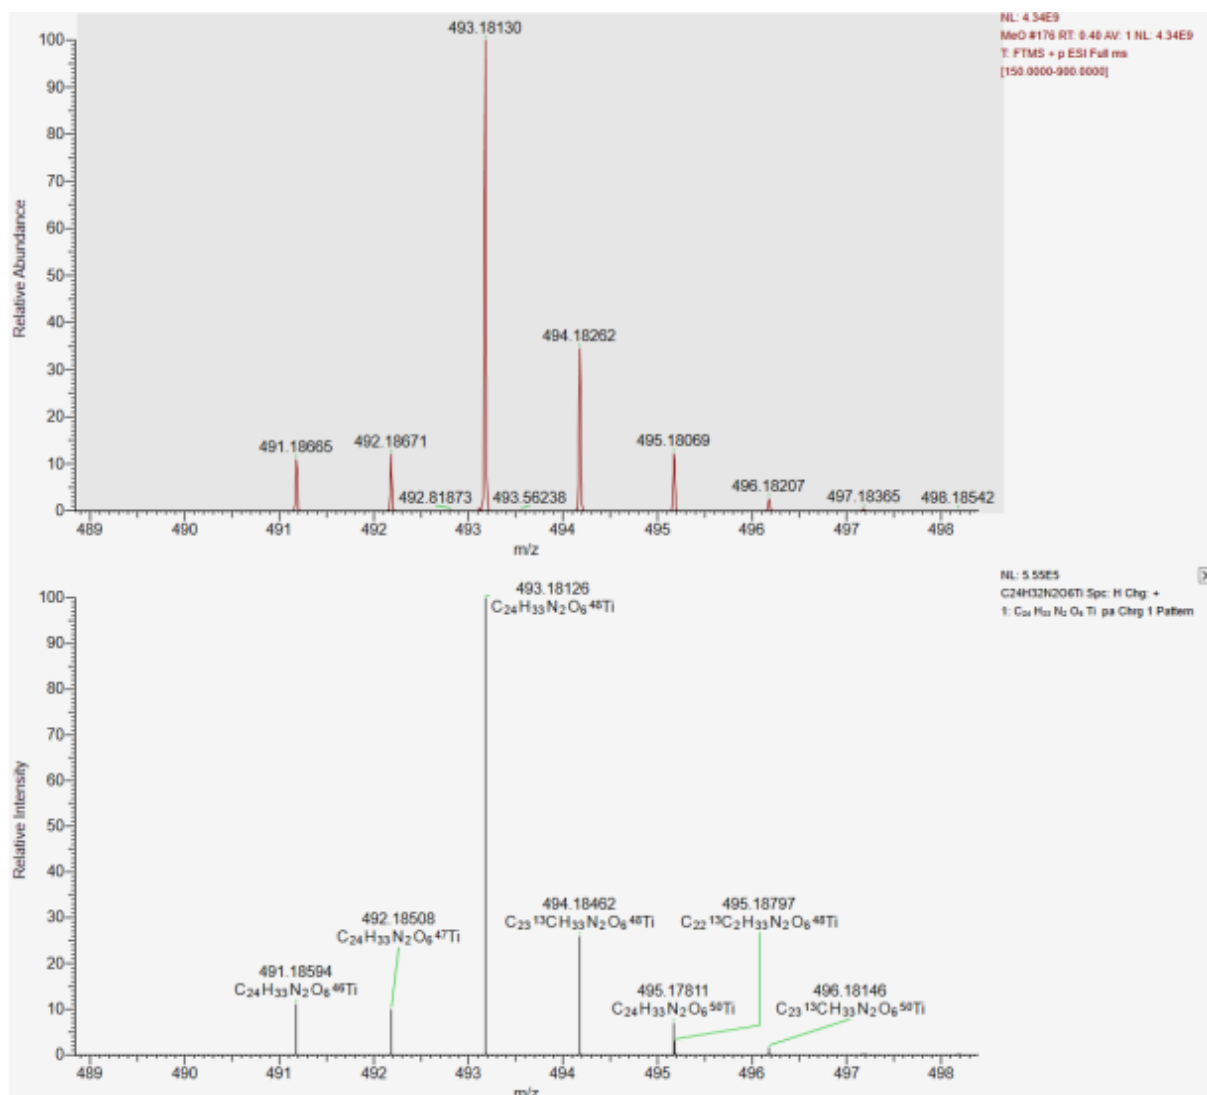

Above -Experimental Spectrum  
 Bottom -Calculated Spectrum

Figure S5. HR-MS of  $L^1Ti$  8 days following its insertion to an aqueous (10%  $H_2O$ , 90%  $CH_3CN$ ) solution.

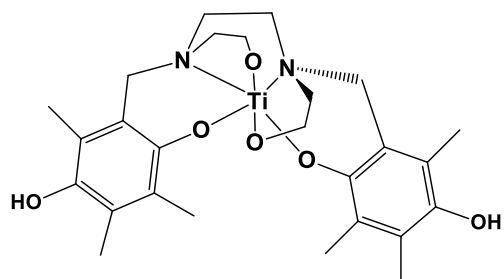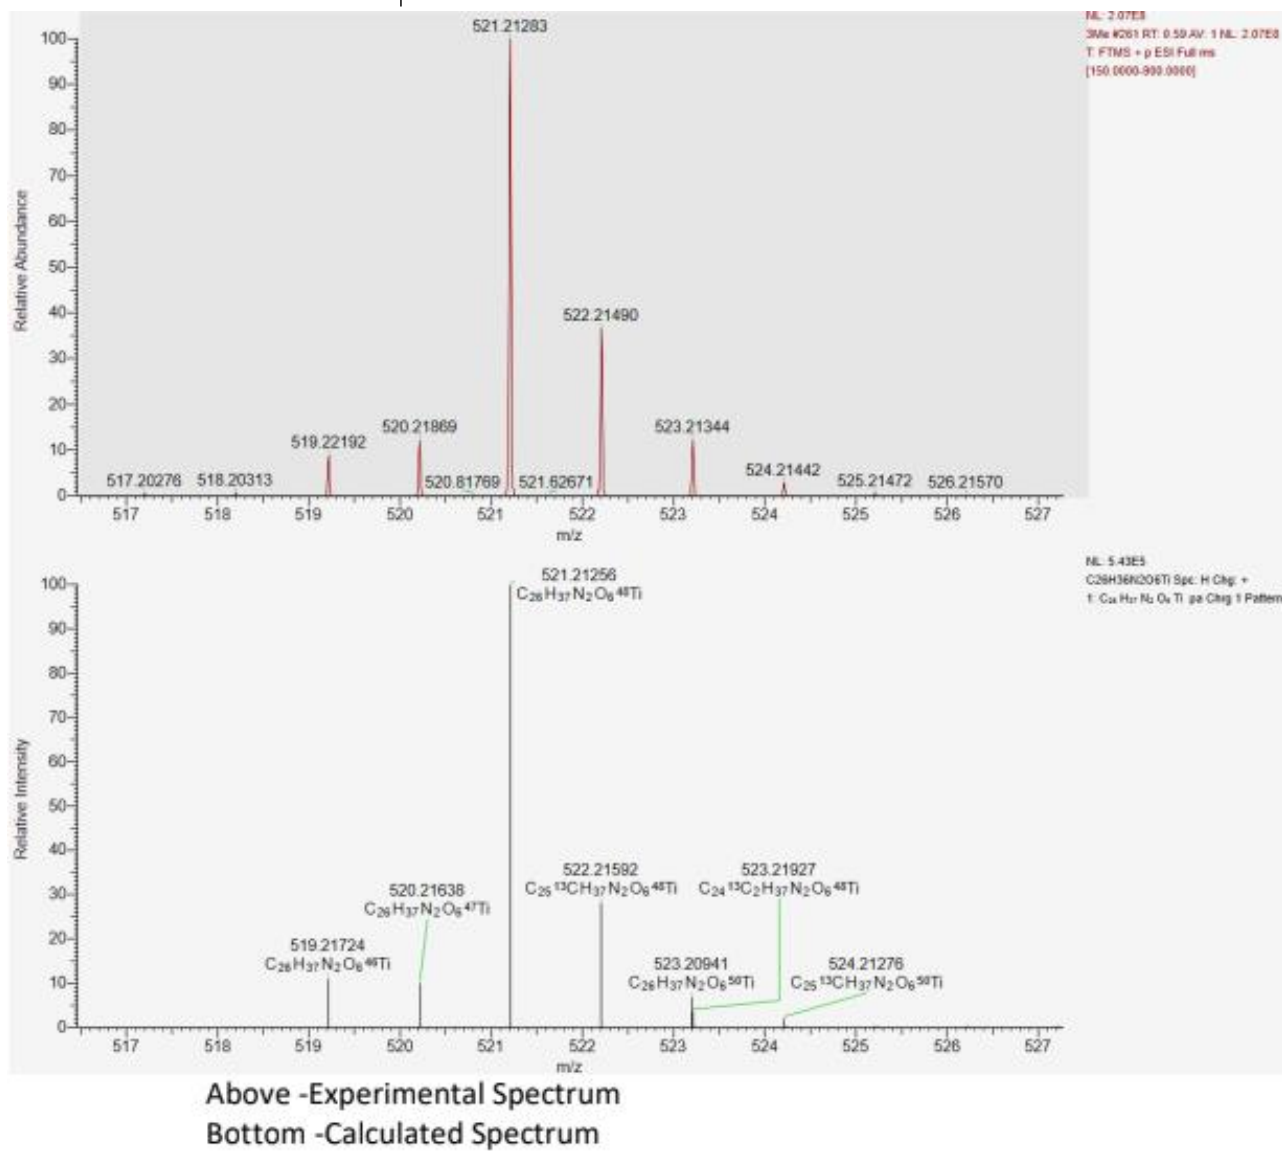

**Figure S6.** HR-MS of L<sup>2</sup>Ti 8 days following its insertion to an aqueous (10% H<sub>2</sub>O, 90% CH<sub>3</sub>CN) solution.

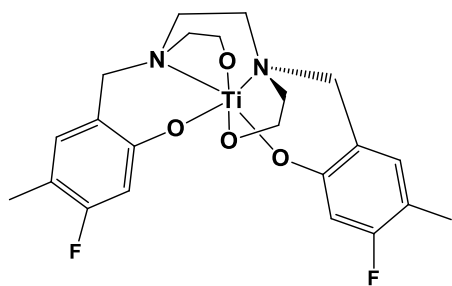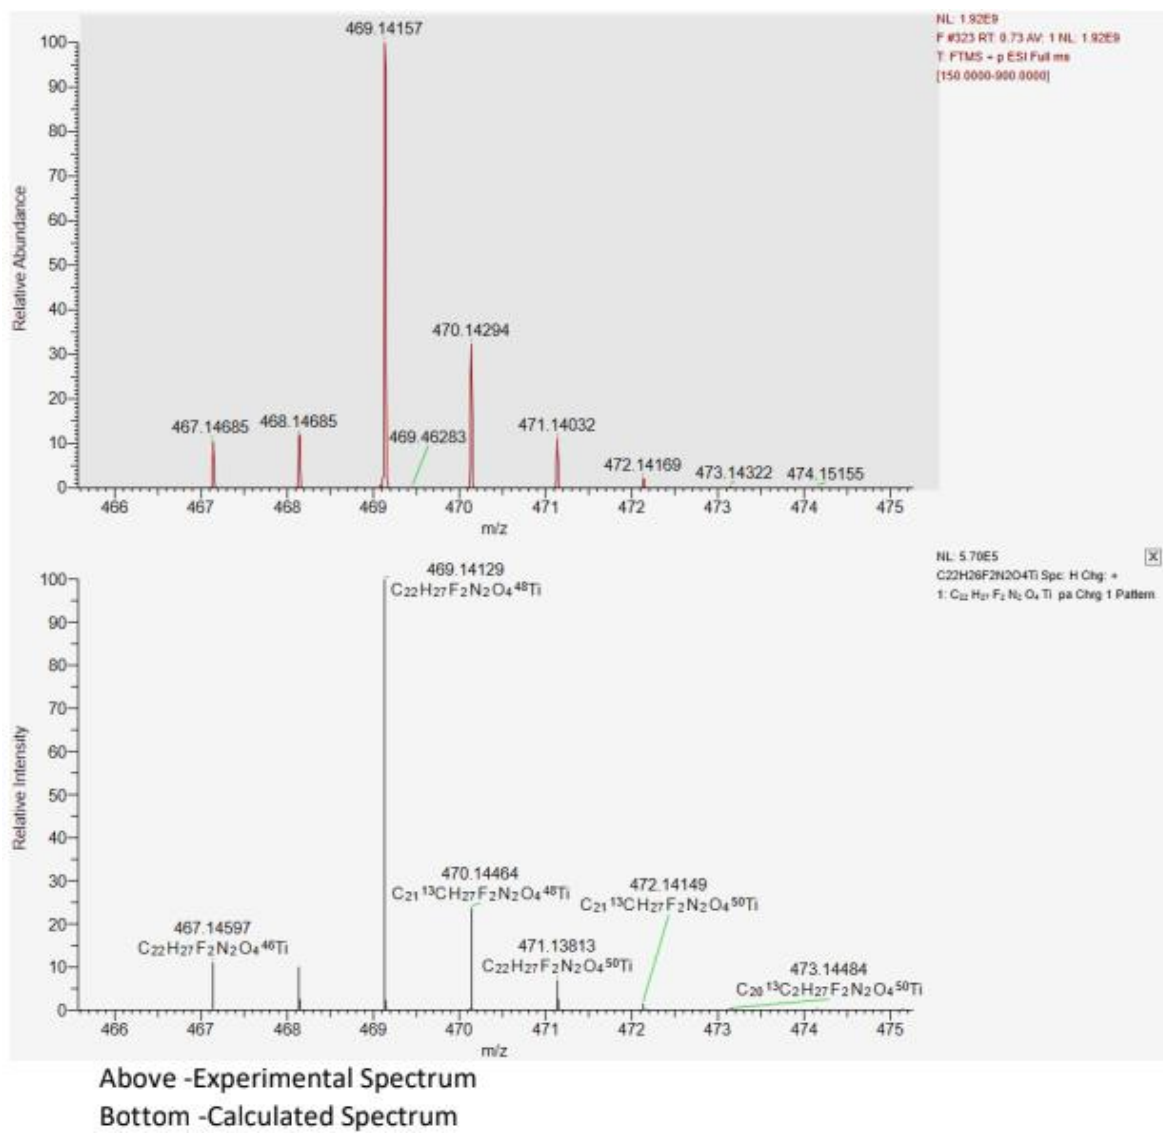

**Figure S7.** HR-MS of  $L^3Ti$  8 days following its insertion to an aqueous (10%  $H_2O$ , 90%  $CH_3CN$ ) solution.

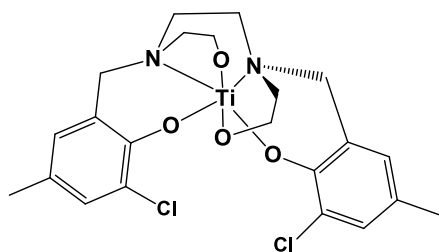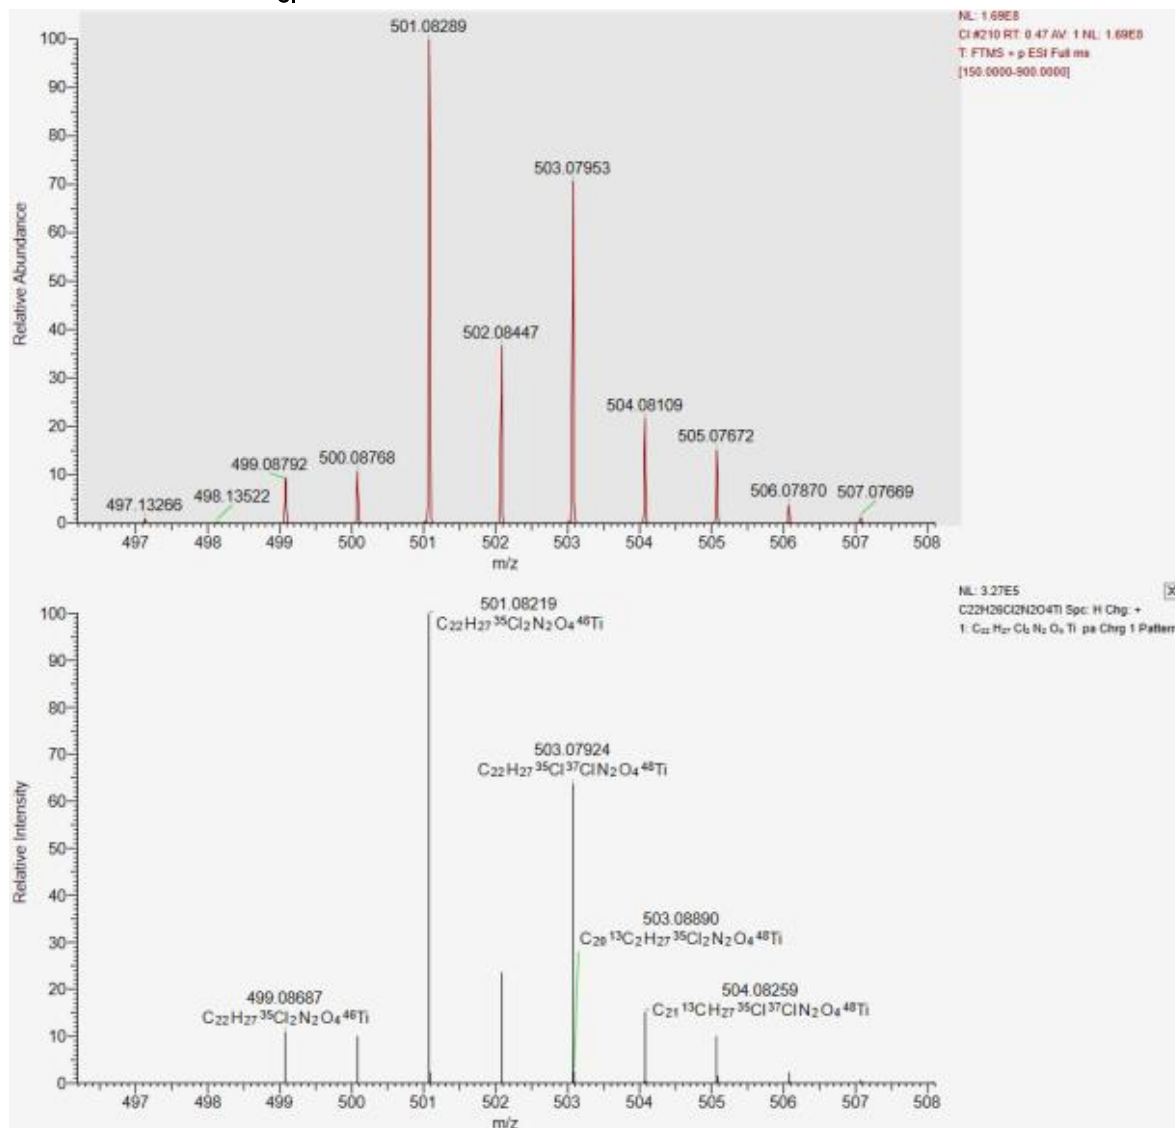

Above -Experimental Spectrum  
 Bottom -Calculated Spectrum

Figure S8. HR-MS of L<sup>4</sup>Ti 8 days following its insertion to an aqueous (10% H<sub>2</sub>O, 90% CH<sub>3</sub>CN) solution.



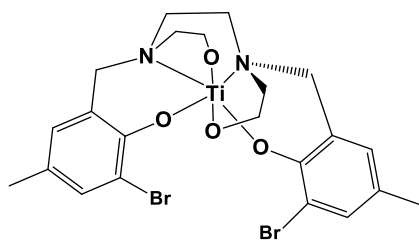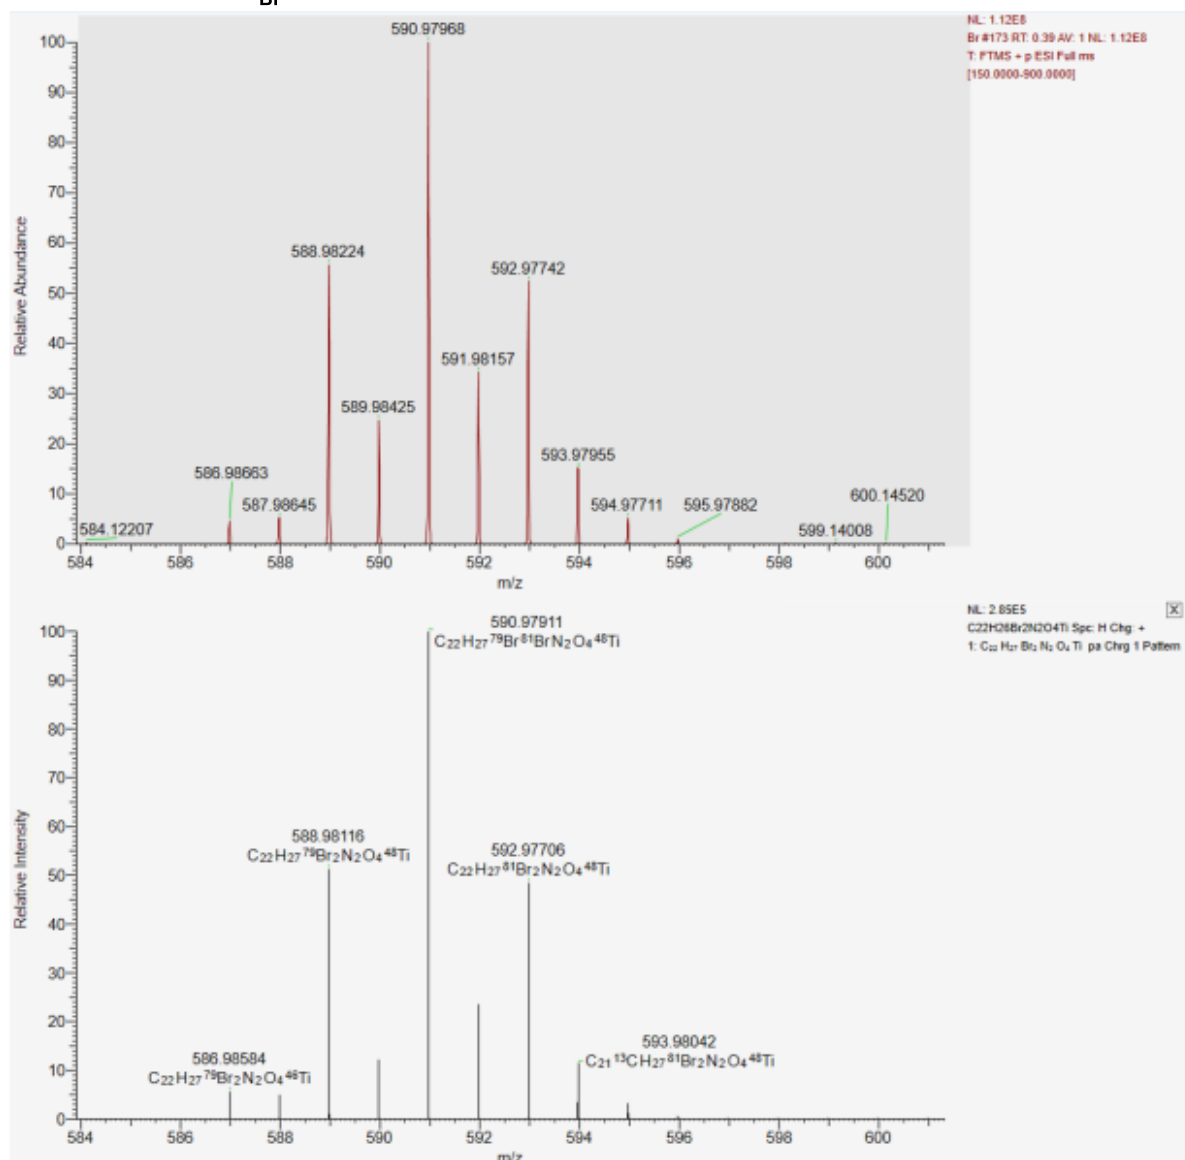

Above -Experimental Spectrum  
 Bottom -Calculated Spectrum

**Figure S9.** HR-MS of L<sup>5</sup>Ti 8 days following its insertion to an aqueous (10% H<sub>2</sub>O, 90% CH<sub>3</sub>CN) solution.

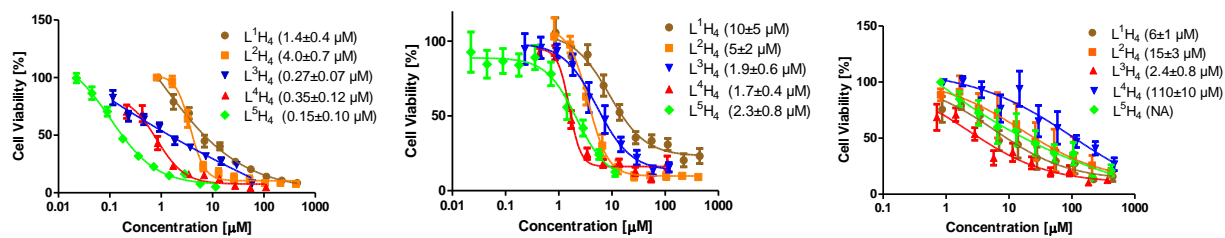

**Figure S10.** Dependence of human ovarian A2780 (left), colon HT-29 (middle), and cervical HeLa (right) cancer cell viability on different concentrations of  $H_4L^{1-5}$  following a three-day incubation period as analyzed by the MTT assay.

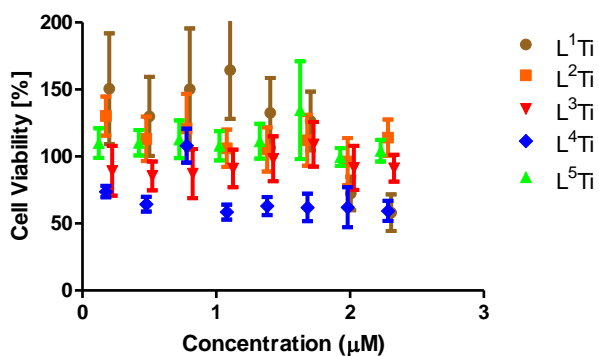

**Figure S11.** Dependence of human fibroblast lung MRC-5 cell viability on different concentrations of  $L^{1-5}Ti$  following a three-day incubation period as analyzed by the MTT assay.

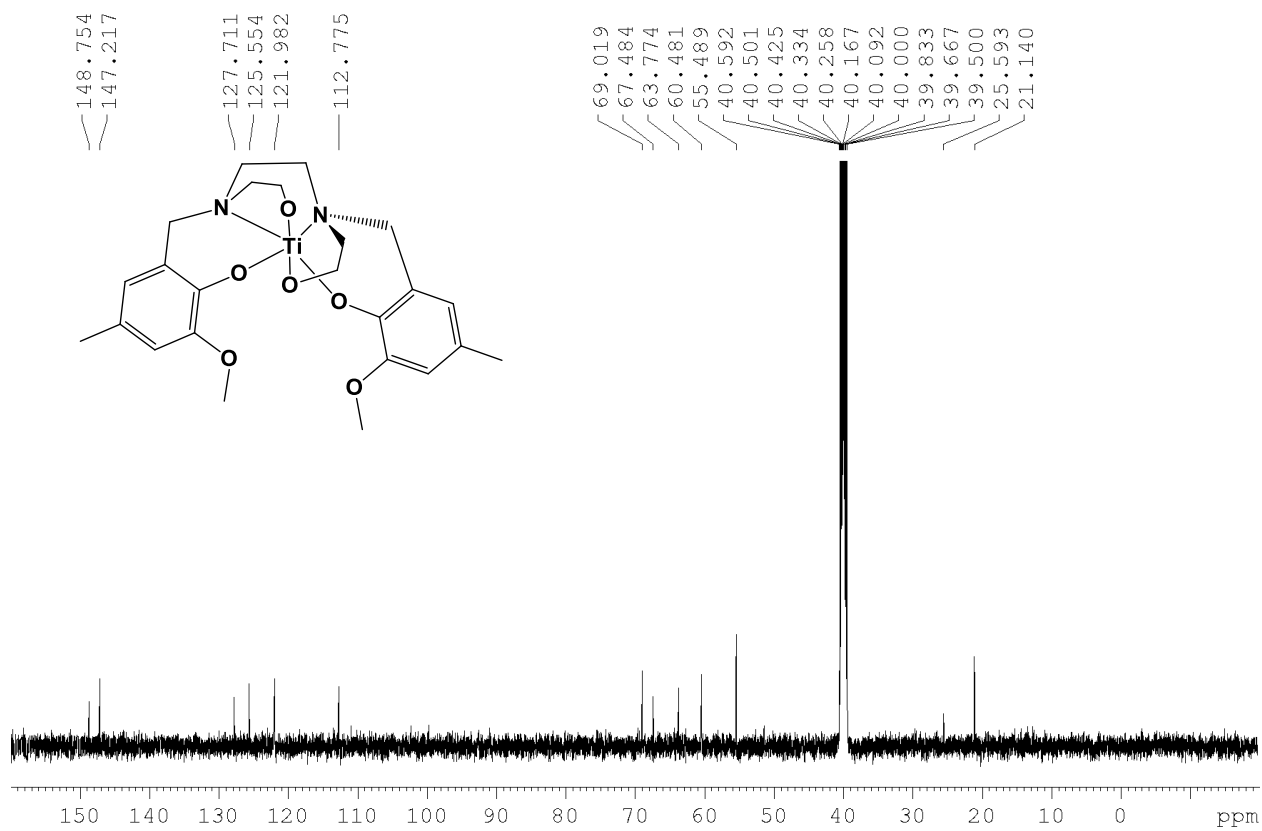

Figure S12.  $^{13}\text{C}$  NMR spectrum of  $\text{L}^1\text{Ti}$  in  $\text{DMSO-}d^6$ .

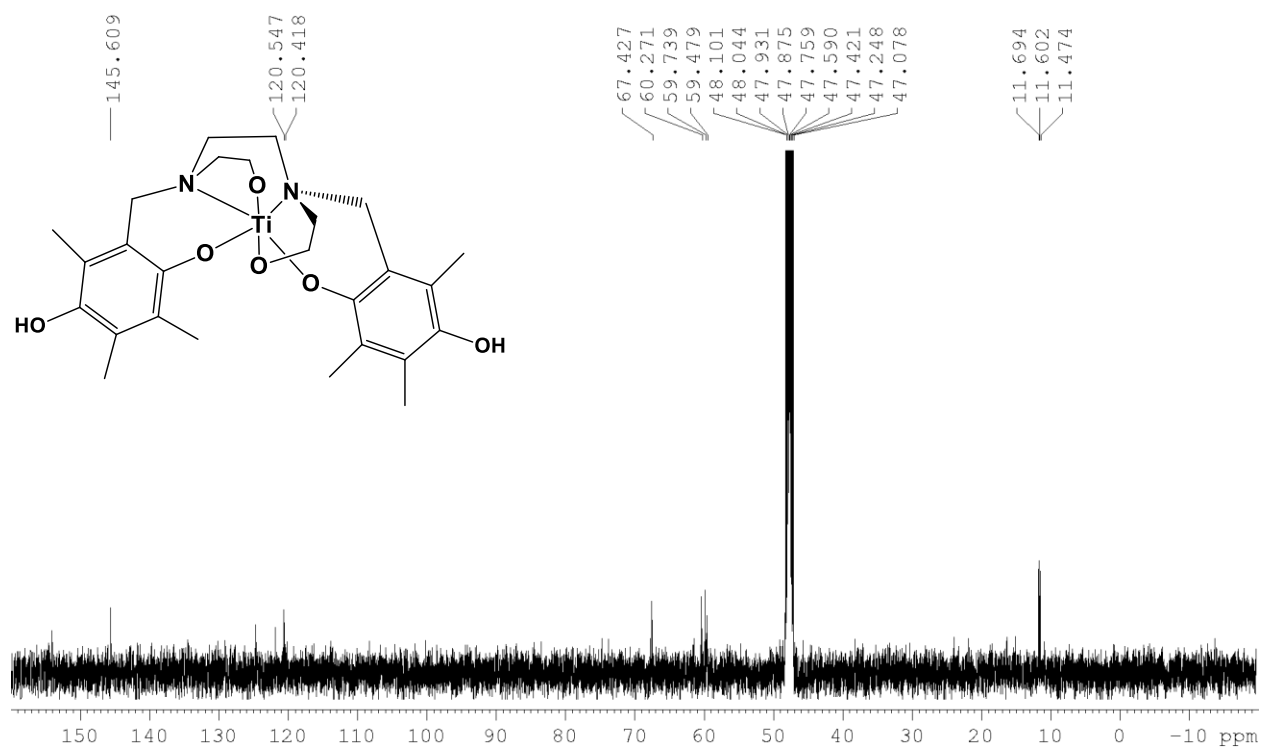

**Figure S13.** <sup>13</sup>C NMR spectrum of L<sup>2</sup>Ti in DMSO-d<sup>6</sup>.

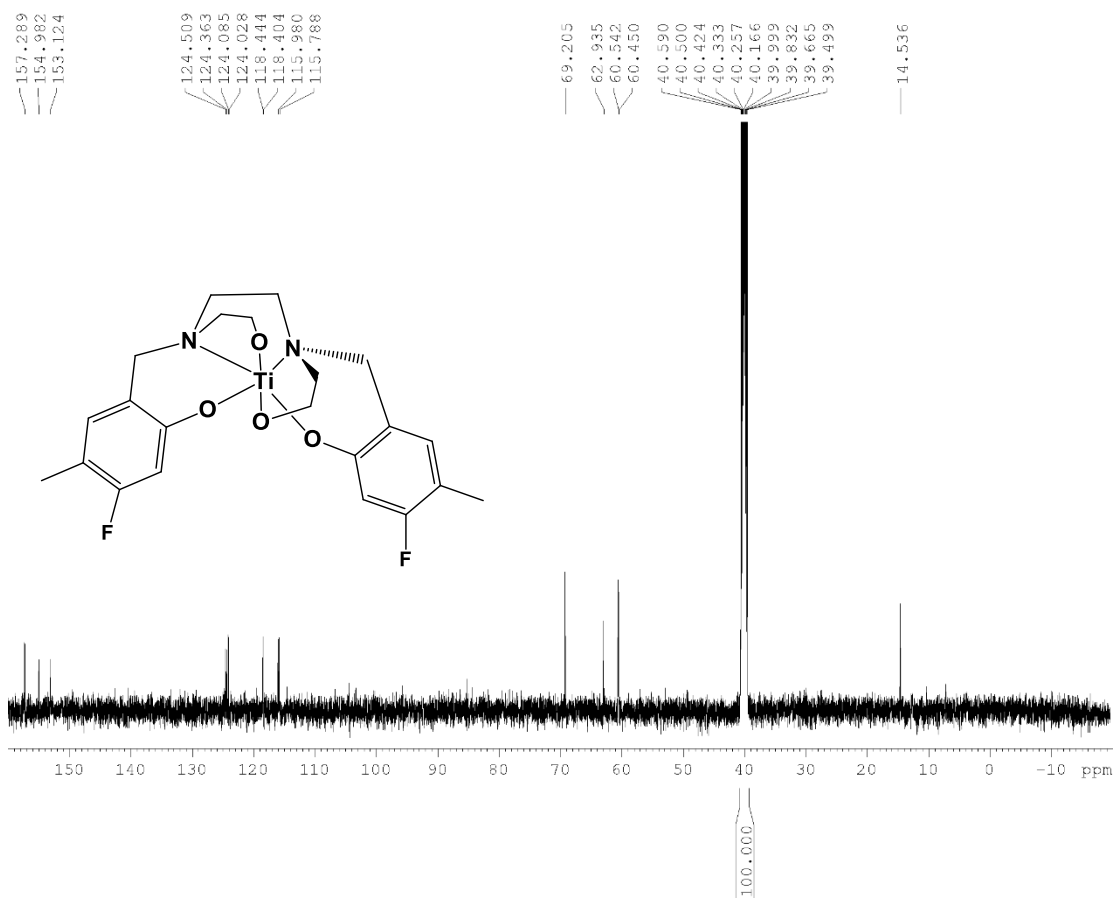

Figure S14.  $^{13}C$  NMR spectrum of  $L^3Ti$  in  $DMSO-d_6$ .

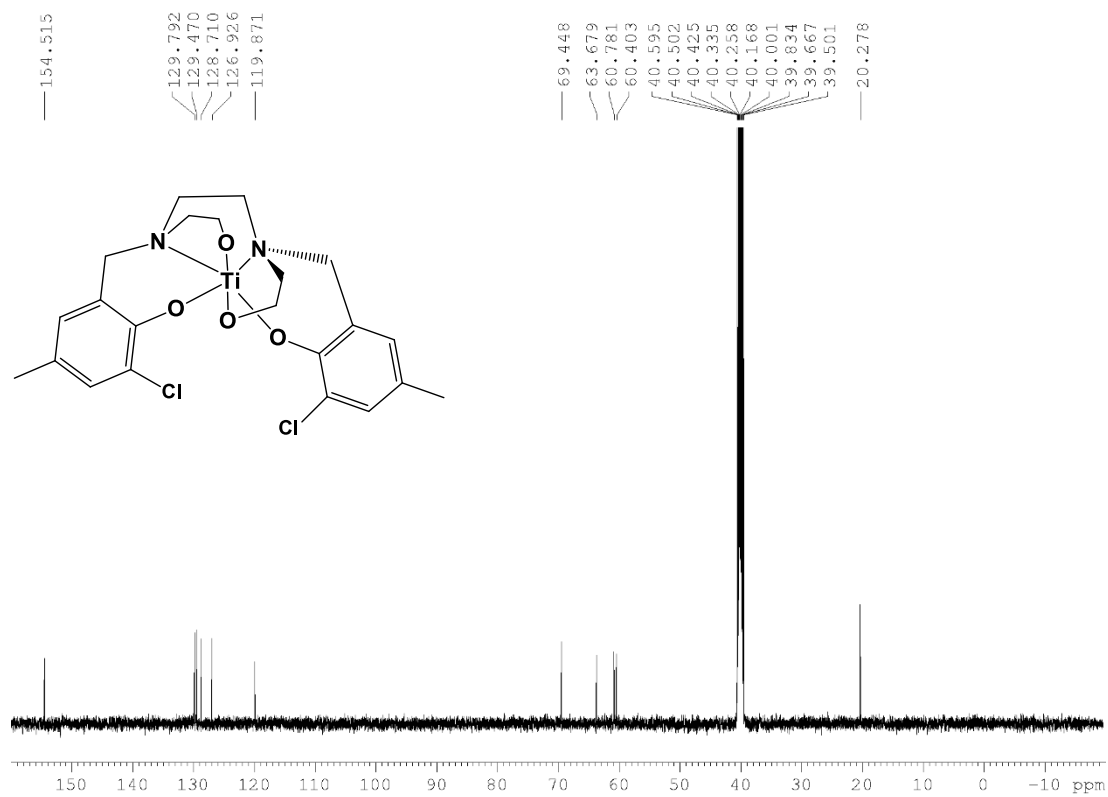

Figure S15.  $^{13}C$  NMR spectrum of  $L^4Ti$  in  $DMSO-d_6$ .

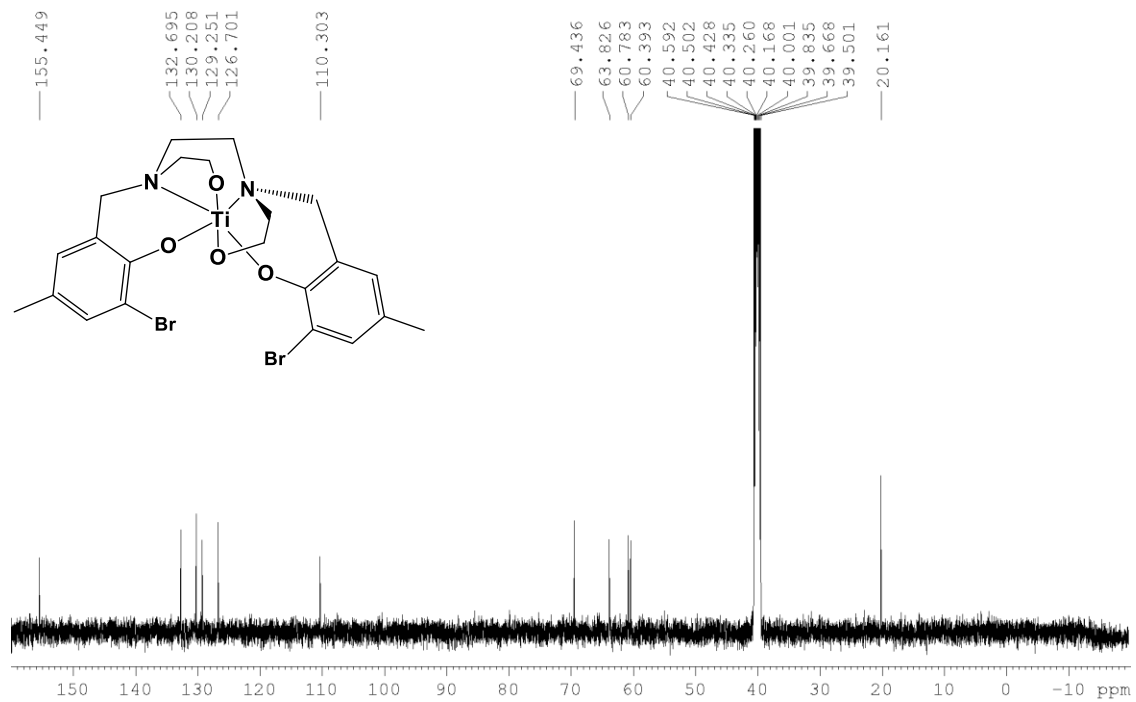

**Figure S16.**  $^{13}\text{C}$  NMR spectrum of  $\text{L}^5\text{Ti}$  in  $\text{DMSO-d}_6$
